# Supplementary figures and images for: Minimized human telomerase maintains telomeres and resolves endogenous roles of H/ACA proteins, TCAB1, and Cajal bodies
Source: eLife journal article supplement (doi:10.7554/elife.18221), 2016-08-15

Figure 1 - figure supplement 1

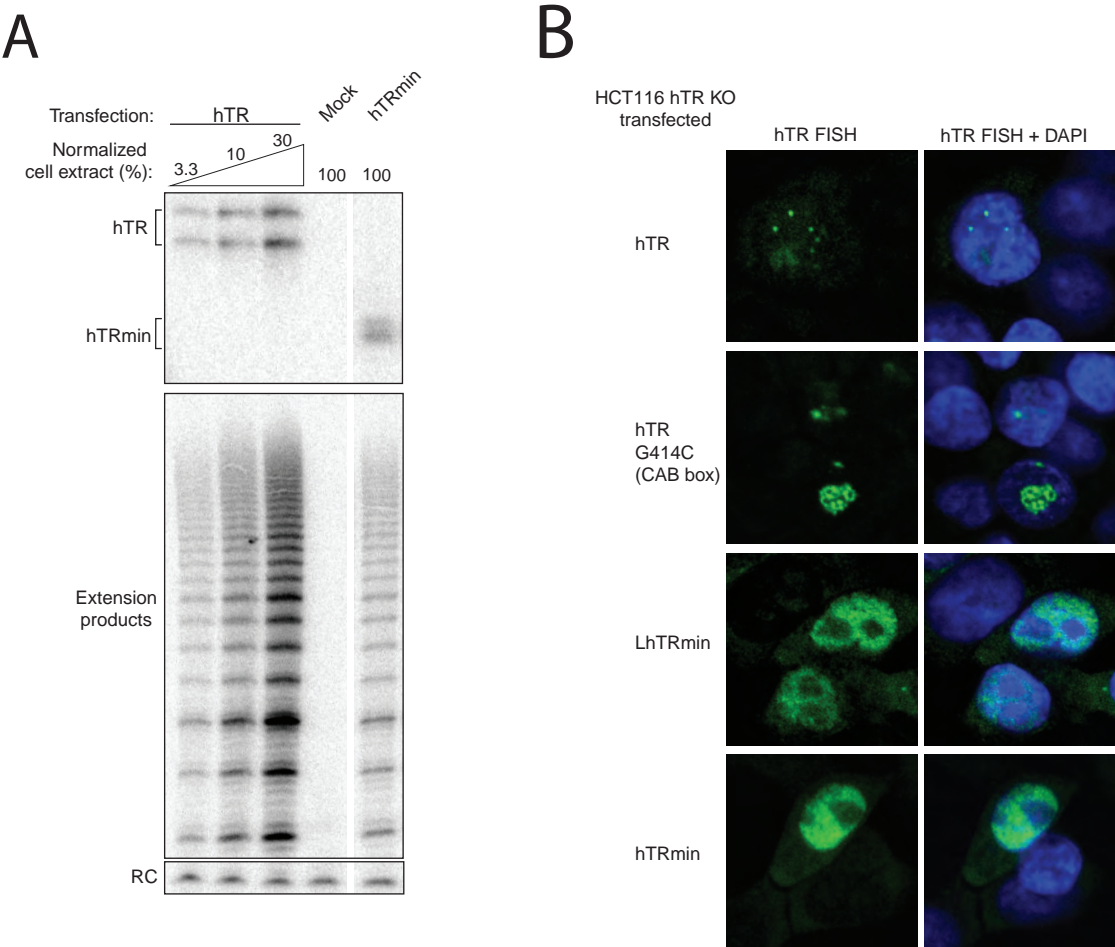

Supplement: supp [file elife-18221-supp-v1.zip]

Figure 5 - figure supplement 1

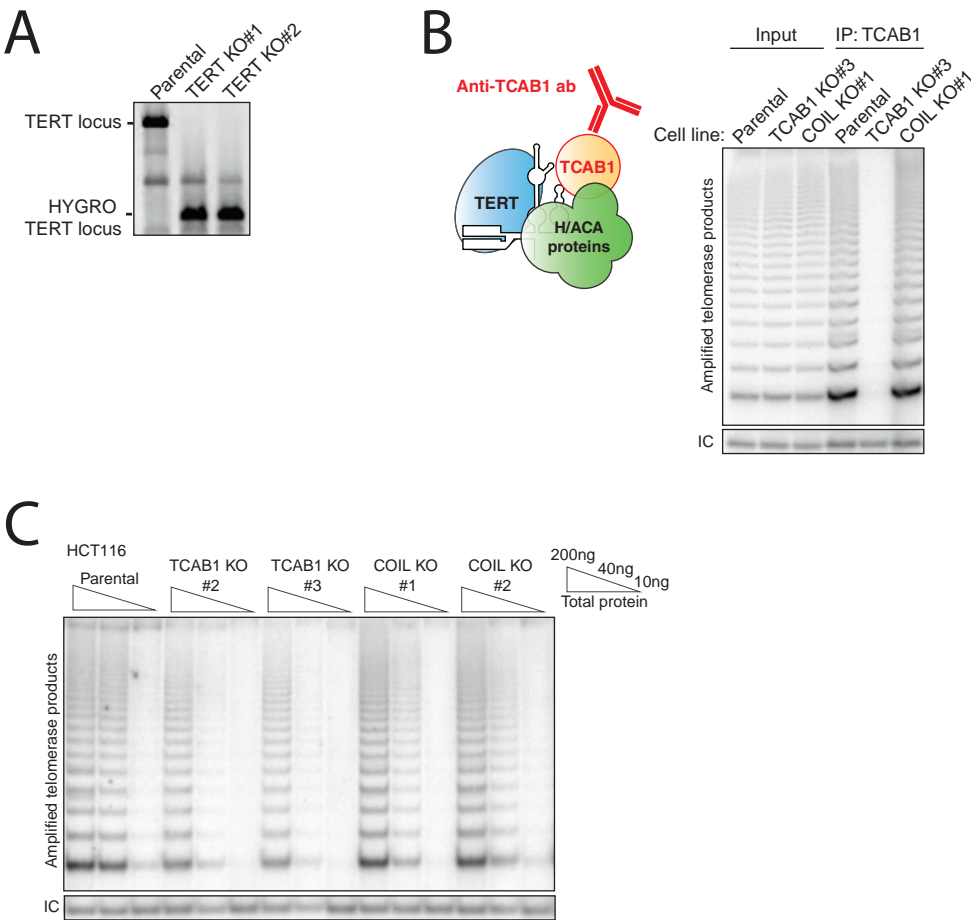

Supplement: supp [file elife-18221-supp-v1.zip]

Figure 3 - figure supplement 1

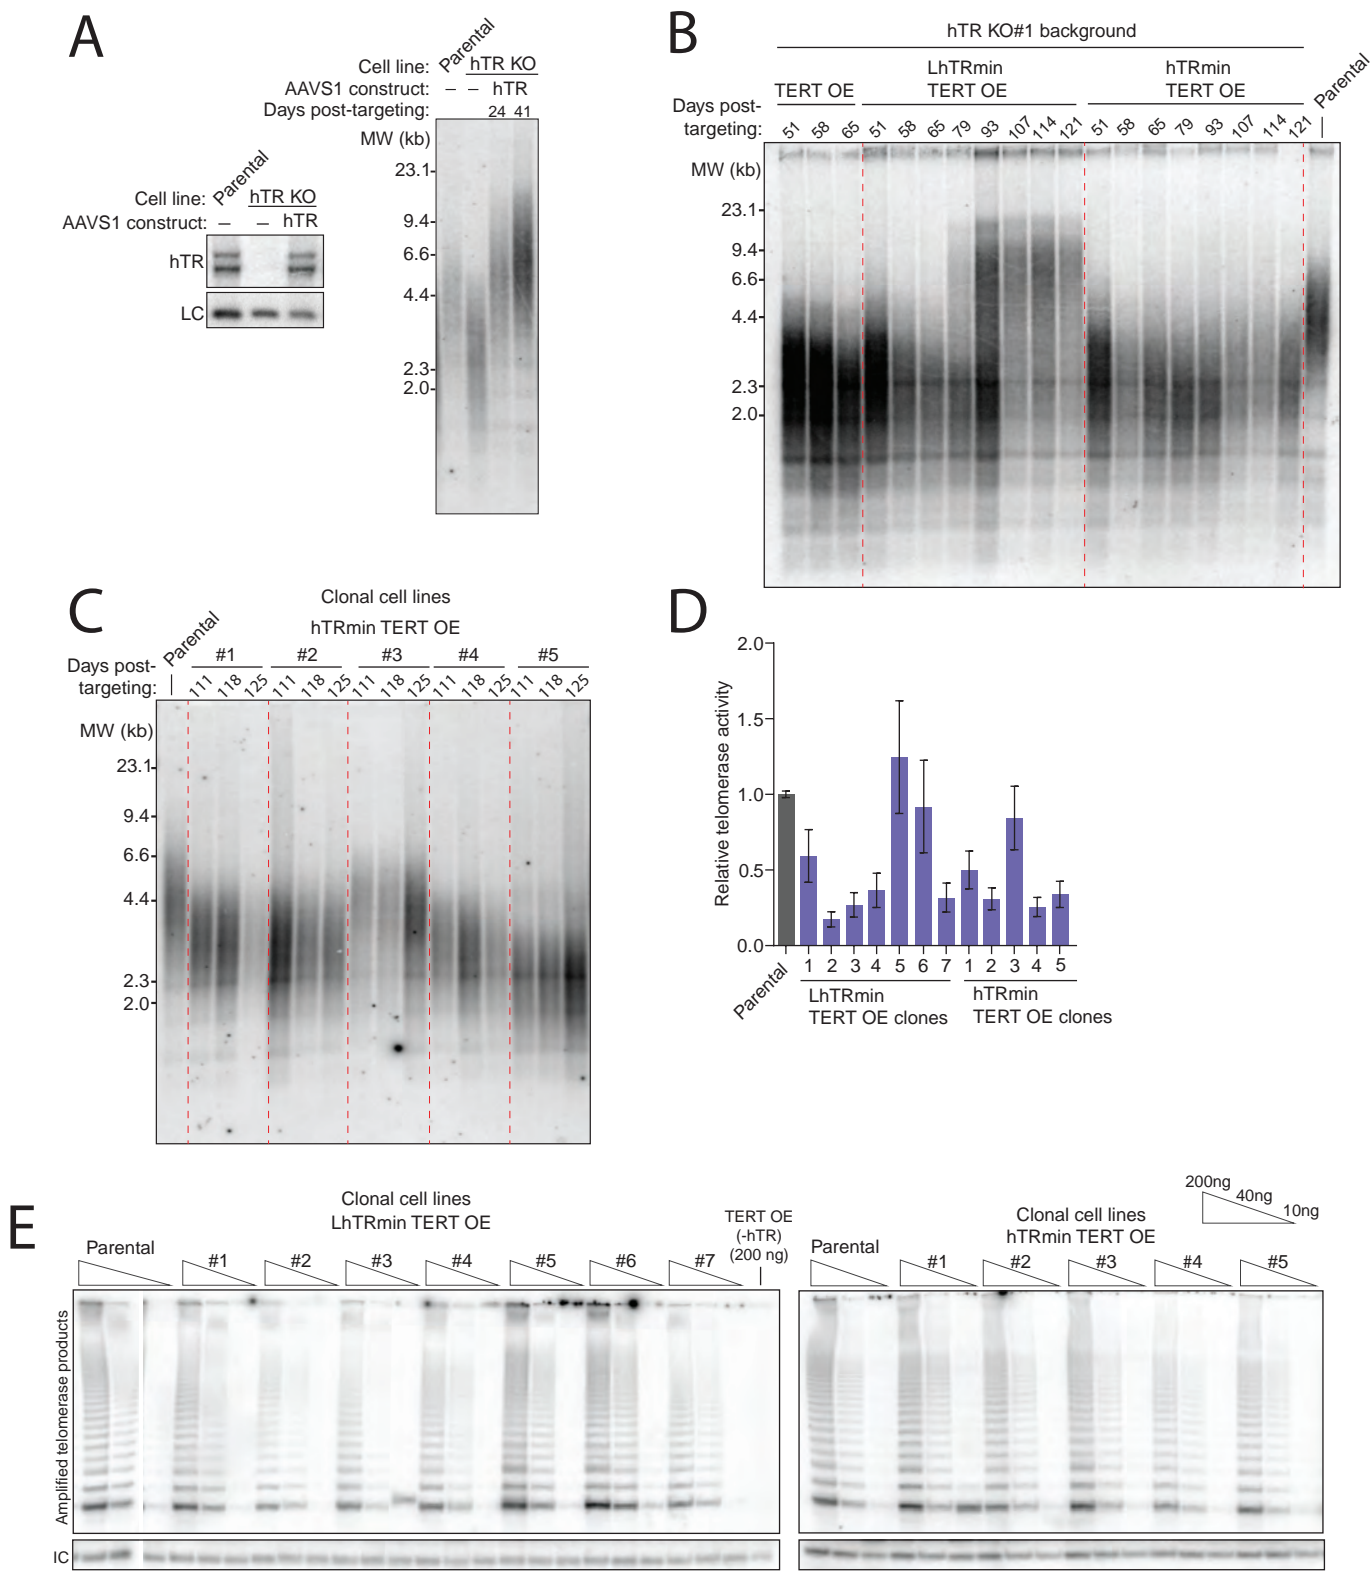

Supplement: supp [file elife-18221-supp-v1.zip]

Figure 5 - figure supplement 3

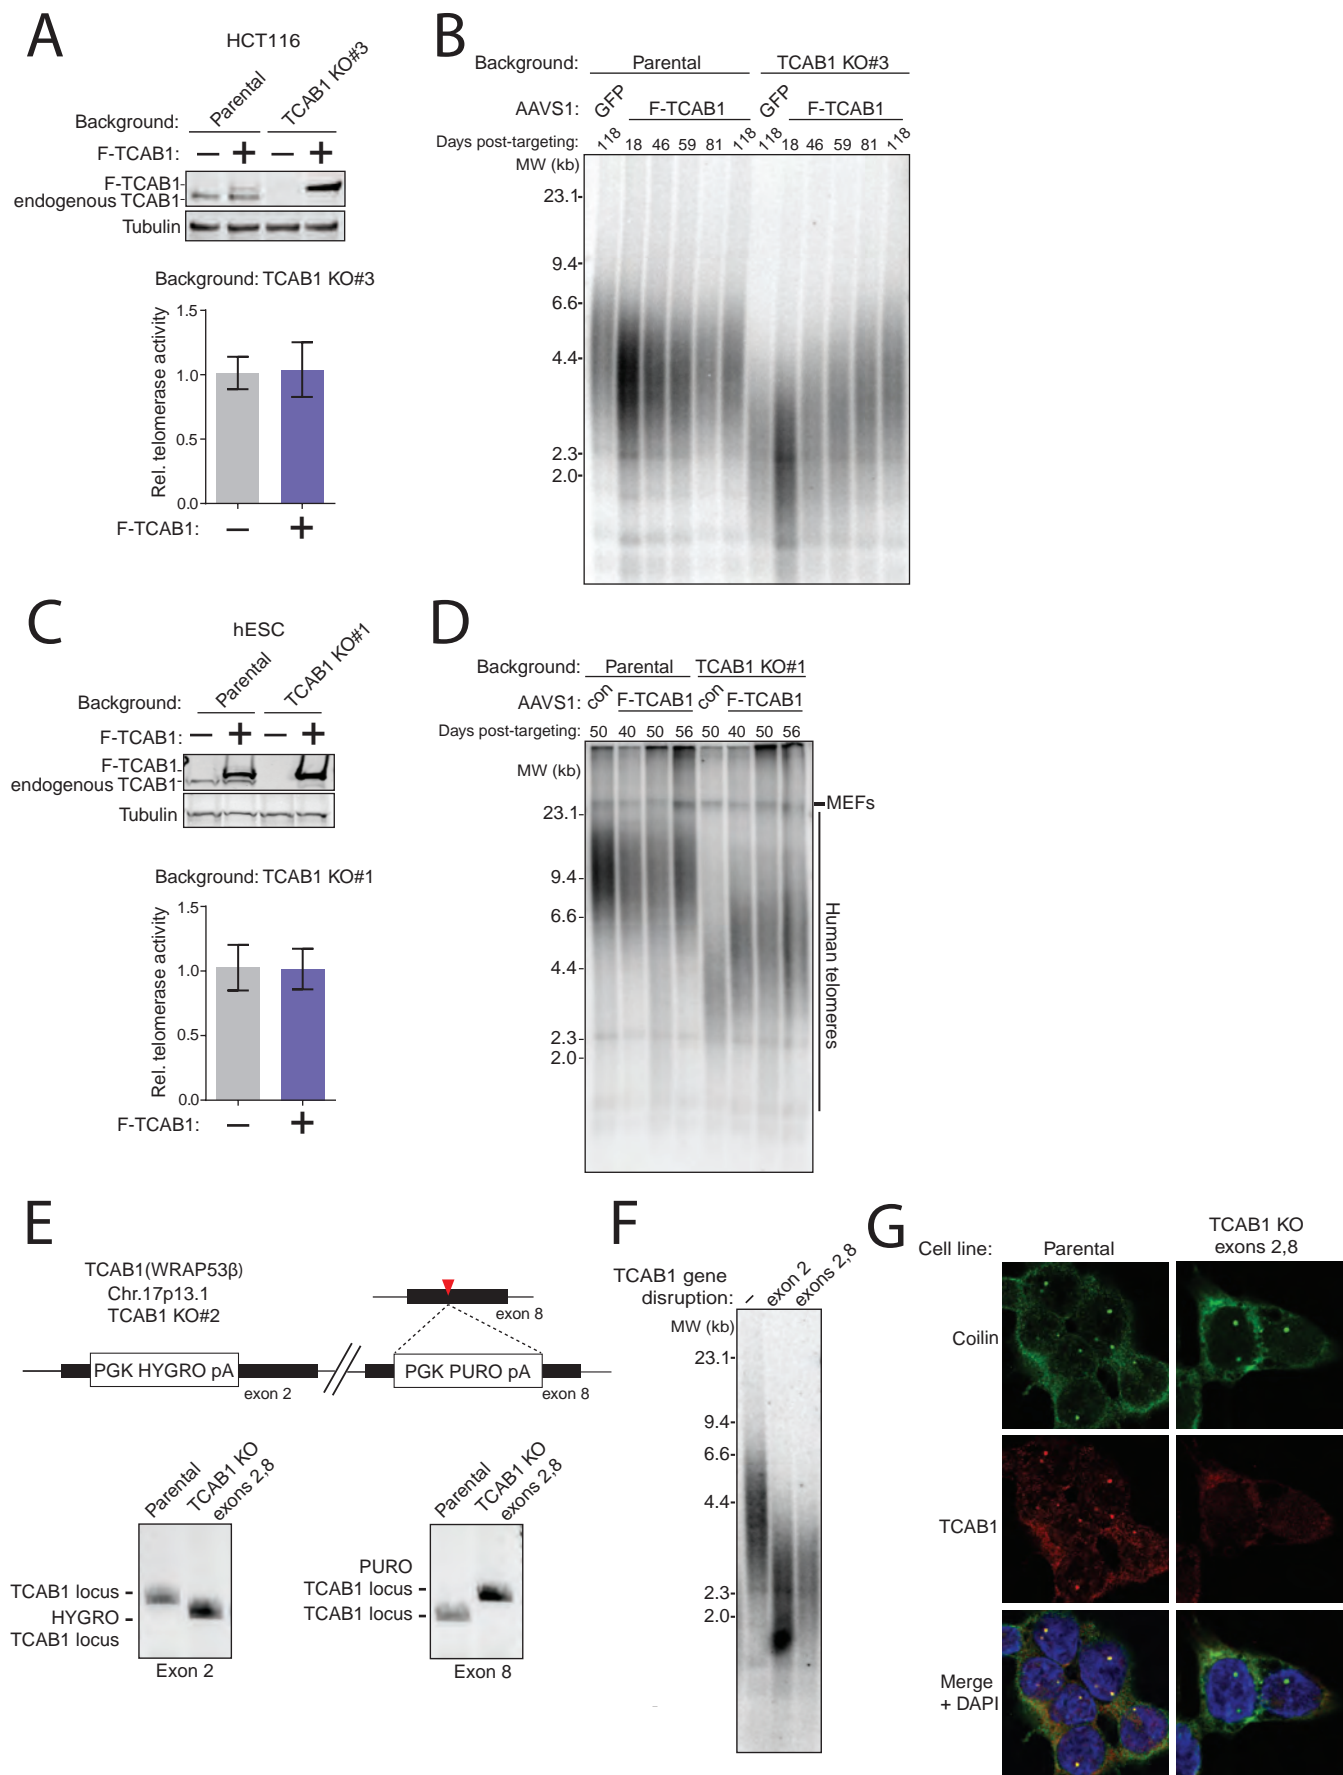

Supplement: supp [file elife-18221-supp-v1.zip]

Figure 4 - figure supplement 1

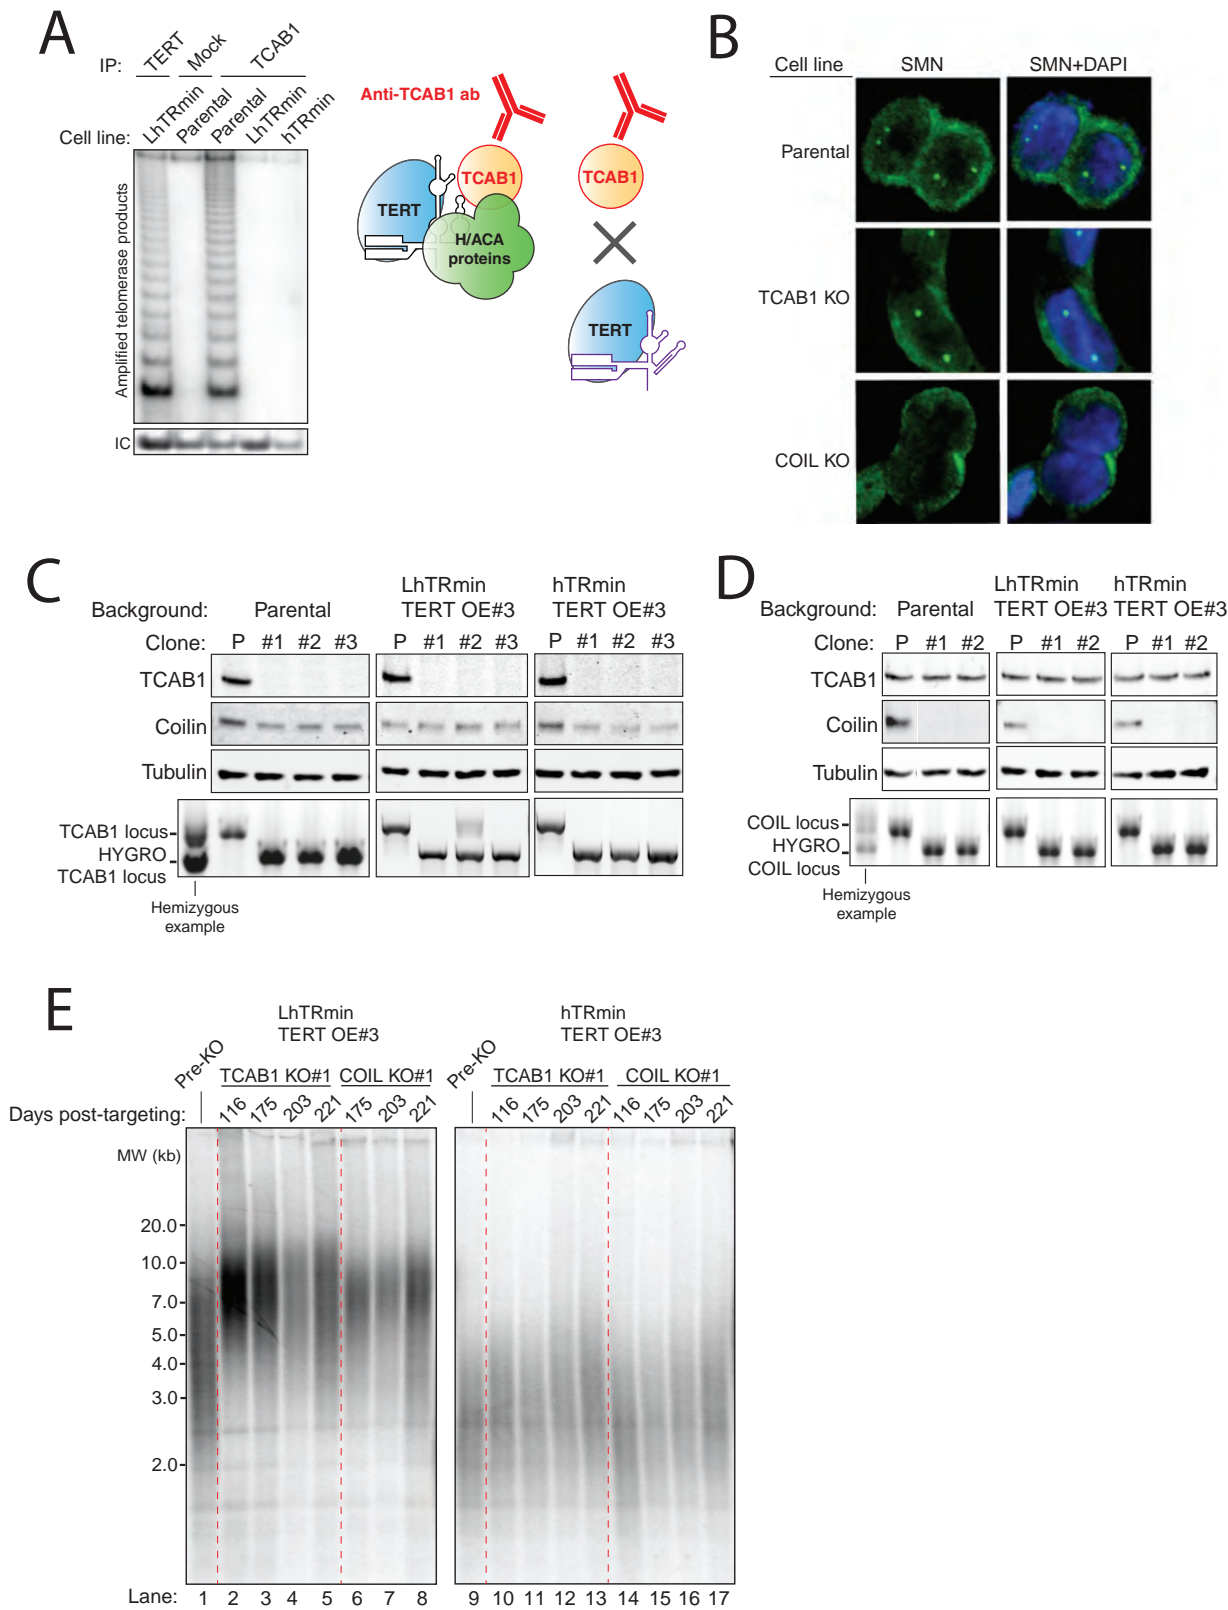

Supplement: supp [file elife-18221-supp-v1.zip]

Figure 2 - figure supplement 1

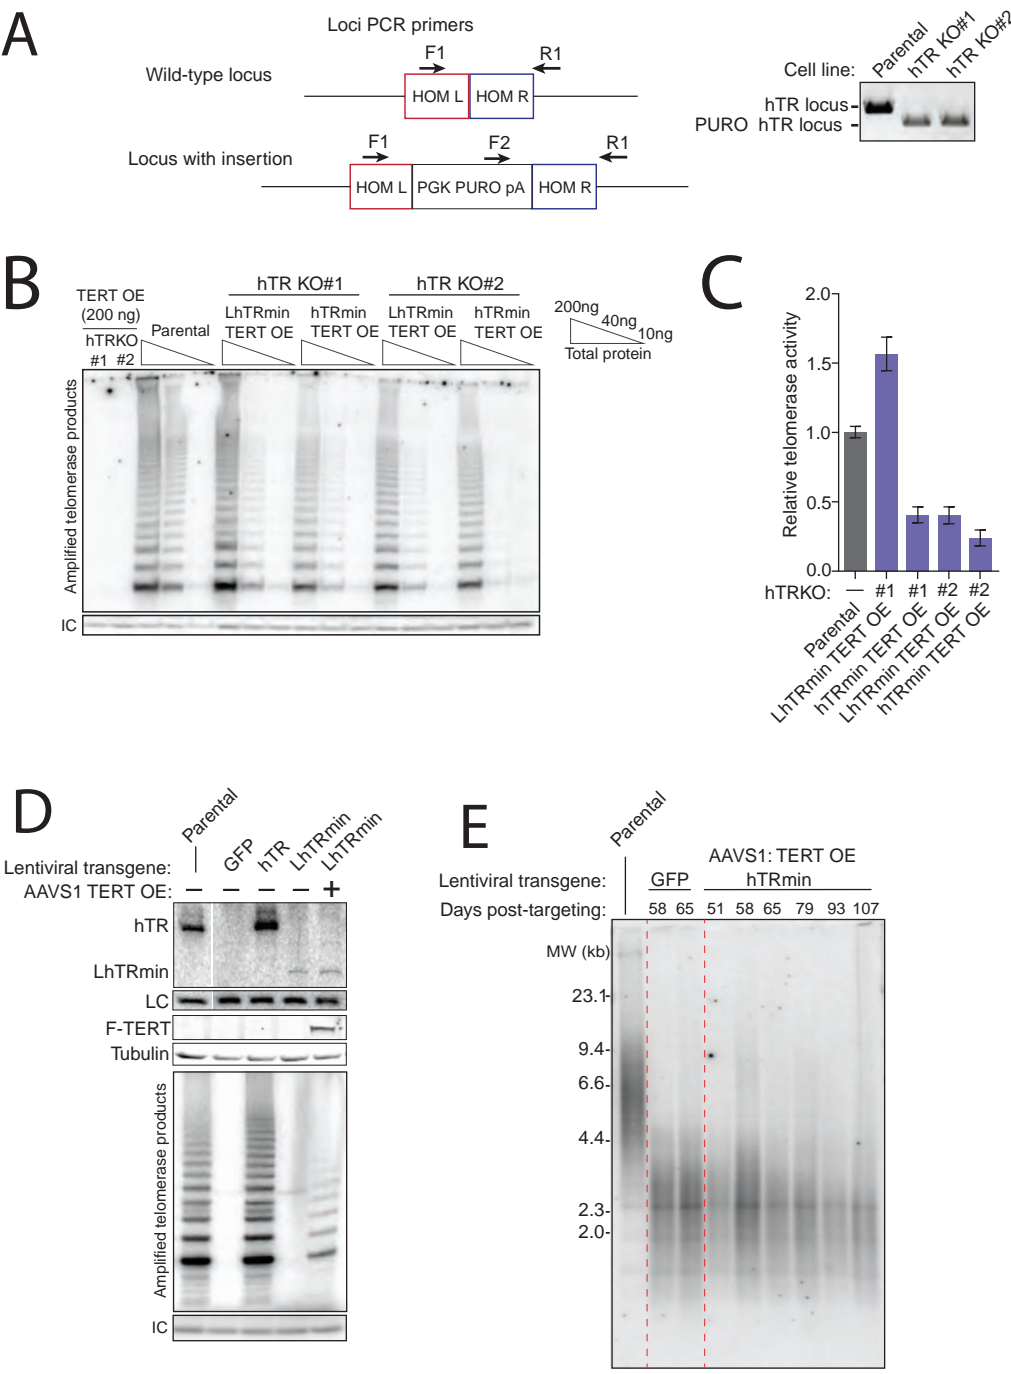

Supplement: supp [file elife-18221-supp-v1.zip]

Figure 5 - figure supplement 2

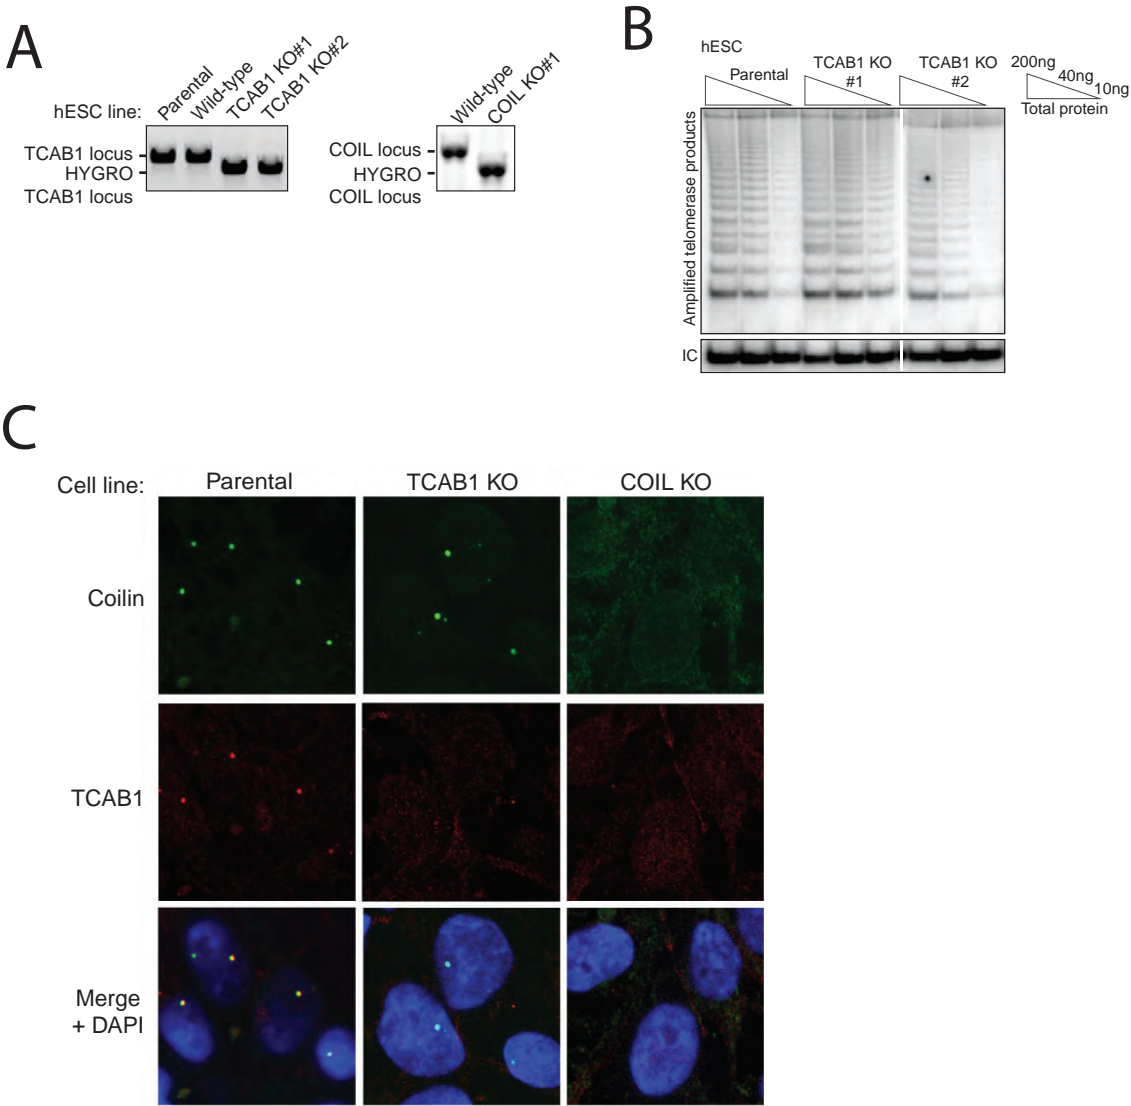

Supplement: supp [file elife-18221-supp-v1.zip]
